# Supplementary material
Source: MDPI journal article supplement (https://www.mdpi.com/2673-1924/1/4/17)
Supplement: s1 [file s1]

# Ontogeny of Orientation during the Early Life History of the Pelagic Teleost Mahi-Mahi, *Coryphaena hippurus* Linnaeus, 1758

Robin Faillettaz <sup>1,2,\*</sup>, Eve Johnson <sup>1</sup>, Patrick Dahlmann <sup>1</sup>, Alexandra Syunkova <sup>1</sup>, John Stieglitz <sup>3</sup>, Daniel Benetti <sup>3</sup>, Martin Grosell <sup>1</sup> and Claire B. Paris <sup>1,\*</sup>

\* Correspondence: [robin.faillettaz@ifremer.fr](mailto:robin.faillettaz@ifremer.fr) (R.F.); [cparis@rsmas.miami.edu](mailto:cparis@rsmas.miami.edu) (C.B.P.)

- **Supplementary Figure S1:** Mean swimming direction for all tested individuals.
- **Supplementary Figure S2:** Mean orientation relative to the light direction for significantly orienting individuals only per time of day and development stages.

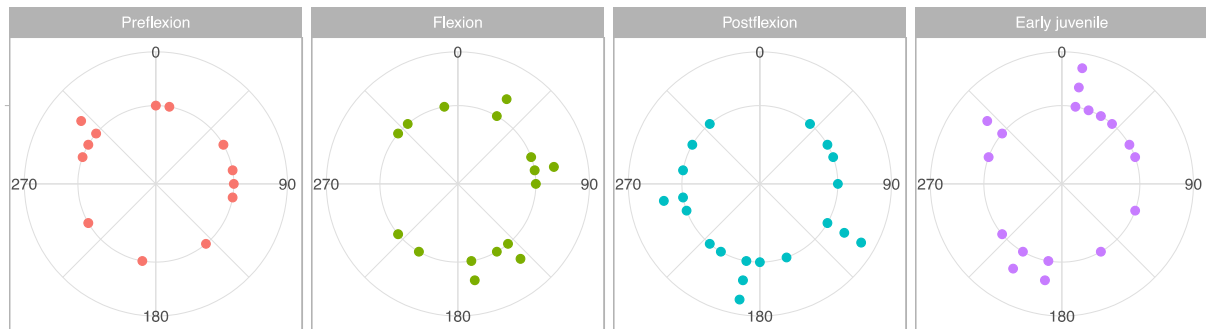

**Supplementary Figure S1. Mean swimming direction, i.e. the bearing followed by the individual *between time steps*, for the development stages tested.** Due to the absence of any significant pattern (homogeneous distributions within and among runs; see Results), all individuals are shown for completeness, with each dot representing one observation run of 10 min. Mean bearings per-run are binned over 10 degrees.

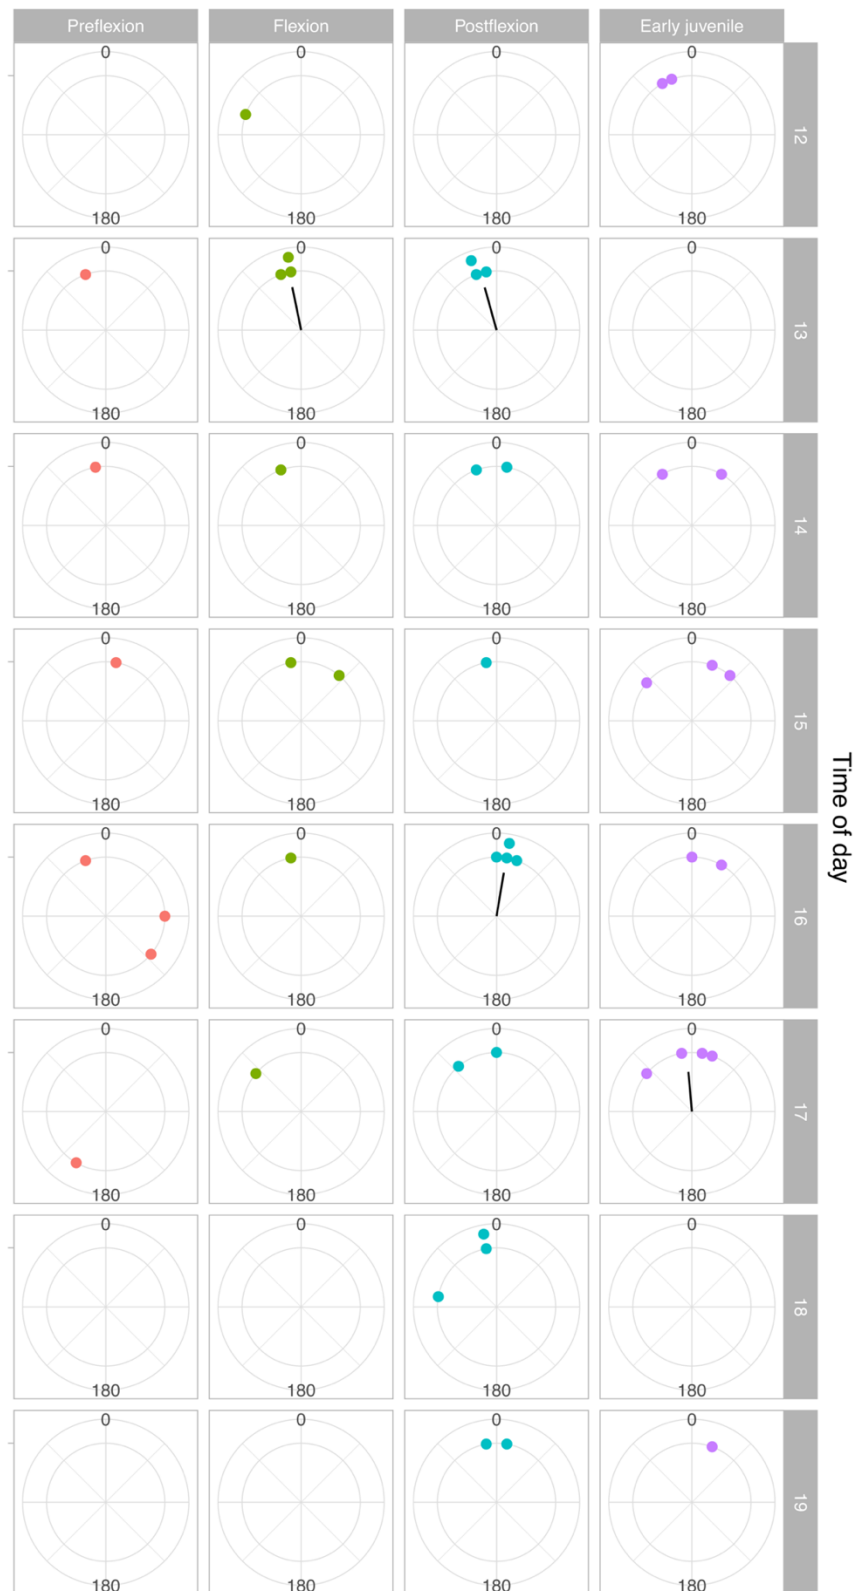

**Supplementary Figure S2. Mean orientation relative to the light direction for significantly orienting individuals only ( $n = 47$ ) per time of day (local time, EST) and each development stage.** Significant mean bearing is shown with a radius (solid line), which length is proportional to the precision of orientation.
